# Supplementary material
Source: publisher site journal article supplement (https://www.dovepress.com/article/252991)
Supplement: Supplementary file 1 [file get_supplementary_file.php]

**Supporting Table S1. Clinical and laboratory data of 29 patients with nonalcoholic steatohepatitis (NASH) enrolled in this study.**

| No. | Sex | Age | Body weight (kg) | Body height (cm) | Body mass index | Waist circumference (cm) | Bood pressure | NASH stage | DM  | MS  | AST (IU/L) | ALT (IU/L) | $\gamma$ GT (IU/L) | TC (mg/dL) | TG (mg/dL) | HDL chol (mg/dL) | LDL chol (mg/dL) | Blood sugar (mg/dL) | HbA1c (%) | RBC ( $\times 10^4/\mu\text{l}$ ) | Hb (g/dl) | WBC (/ $\mu\text{l}$ ) | Neutro (%) | Lympho (%) | Mono (%) | Plts ( $\times 10^4/\mu\text{l}$ ) | Grade of fatty liver* | PIIIP (ng/mL) | Type IV collagen (ng/mL) | Hyaluronic acid (ng/mL) |
|-----|-----|-----|------------------|------------------|-----------------|--------------------------|---------------|------------|-----|-----|------------|------------|--------------------|------------|------------|------------------|------------------|---------------------|-----------|-----------------------------------|-----------|------------------------|------------|------------|----------|------------------------------------|-----------------------|---------------|--------------------------|-------------------------|
| N1  | M   | 66  | 51               | 154              | 21.7            | 82                       | 145/72        | advanced   | IGT | No  | 27         | 28         | 14                 | 208        | 122        | 44               | 145              | 99                  | 5.7       | 443                               | 14        | 4130                   | 43.2       | 49.6       | 4.6      | 19.5                               | moderate to severe    | 7.84          | 86                       | 42                      |
| N2  | M   | 45  | 69               | 172              | 23.3            | 84                       | 123/75        | early      | DM  | No  | 61         | 72         | 21                 | 168        | 147        | 40               | 112              | 111                 | 5.7       | 486                               | 14.2      | 5380                   | 50.4       | 39.2       | 7.4      | 33.8                               | moderate              | 6.78          | 107                      | 29                      |
| N3  | M   | 60  | 89               | 163              | 30.4            | 117                      | 126/75        | early      | DM  | Yes | 15         | 12         | 29                 | 195        | 152        | 44               | 127              | 109                 | 5.9       | 530                               | 15.7      | 5790                   | 62.5       | 26.3       | 6.2      | 26                                 | moderate              | 7.82          | 147                      | 11                      |
| N4  | M   | 54  | 69               | 170              | 23.5            | 85                       | 138/87        | advanced   | DM  | No  | 22         | 22         | 30                 | 276        | 188        | 82               | 151              | 127                 | 6.5       | 492                               | 15.1      | 3580                   | 47.2       | 42.2       | 7.3      | 17.5                               | moderate              | 5.88          | 114                      | 21                      |
| N5  | F   | 42  | 64               | 164              | 24              | 91                       | 139/78        | advanced   | No  | Yes | 32         | 46         | 192                | 214        | 112        | 48               | 142              | 104                 | 6         | 571                               | 15.2      | 6280                   | 62.4       | 28.5       | 6.4      | 27.9                               | moderate              | 10.2          | 123                      | 11                      |
| N6  | M   | 42  | 55               | 166              | 19.9            | 73                       | 128/89        | advanced   | No  | No  | 21         | 23         | 75                 | 181        | 99         | 49               | 114              | 90                  | 5.6       | 517                               | 15.8      | 7400                   | 38         | 46.8       | 4.5      | 31.7                               | moderate              | 4.26          | 143                      | $\leq 9$                |
| N7  | M   | 50  | 82               | 172              | 27.7            | 90                       | 129/89        | early      | No  | No  | 24         | 27         | 30                 | 196        | 70         | 66               | 118              | 103                 | 5.8       | 554                               | 16.3      | 5750                   | 59.3       | 28         | 6.8      | 29.3                               | mild                  | 10.5          | 135                      | 38                      |
| N8  | M   | 41  | 93               | 170              | 32.2            | 104                      | 139/83        | early      | No  | No  | 29         | 45         | 49                 | 169        | 262        | 34               | 90               | 99                  | 5.9       | 521                               | 15.9      | 7550                   | 50.5       | 42.4       | 4.4      | 30                                 | severe                | 0.55          | 115                      | 39                      |
| N9  | M   | 27  | 92               | 167              | 32.8            | 108                      | 137/78        | early      | No  | Yes | 17         | 23         | 26                 | 145        | 46         | 46               | 90               | 124                 | 5.4       | 525                               | 15.1      | 6800                   | 60.5       | 27.5       | 5.4      | 21.7                               | severe                | 6.04          | 90                       | 17                      |
| N10 | M   | 41  | 68               | 169              | 23.3            | 83                       | 137/87        | early      | No  | No  | 25         | 41         | 30                 | 192        | 176        | 55               | 117              | 96                  | 5.6       | 485                               | 14.6      | 4540                   | 53.1       | 36.6       | 7.9      | 25.8                               | mild to moderate      | 5.55          | 71                       | $\leq 9$                |
| N11 | M   | 53  | 88               | 176              | 28.5            | 94                       | 140/82        | advanced   | No  | Yes | 24         | 27         | 18                 | 156        | 58         | 58               | 83               | 102                 | 5.6       | 481                               | 15.4      | 5890                   | 58.1       | 29.7       | 7.1      | 20.4                               | mild                  | 5.71          | 90                       | 14                      |
| N12 | F   | 45  | 87               | 157              | 35.3            | 96                       | 160/95        | advanced   | IGT | Yes | 49         | 68         | 62                 | 217        | 212        | 36               | 144              | 111                 | 6.3       | 469                               | 13.4      | 7160                   | 47         | 34.2       | 3.8      | 23.5                               | moderate              | 0.7           | 159                      | 20                      |
| N13 | M   | 50  | 85               | 167              | 29.9            | 98                       | 146/97        | advanced   | No  | Yes | 24         | 26         | 31                 | 161        | 62         | 62               | 90               | 98                  | 5.6       | 529                               | 17.5      | 6380                   | 51.5       | 39.5       | 6.3      | 16                                 | severe                | 6.98          | 105                      | 14                      |
| N14 | F   | 68  | 51               | 154              | 21.5            | 76                       | 116/78        | early      | IGT | No  | 18         | 13         | 12                 | 156        | 111        | 59               | 81               | 104                 | 6         | 476                               | 14.9      | 4280                   | 58.3       | 32.2       | 7.2      | 23.9                               | mild                  | 9.29          | 132                      | 44                      |
| N15 | M   | 41  | 66               | 165              | 24.2            | 92                       | 125/70        | early      | IGT | Yes | 27         | 29         | 14                 | 143        | 52         | 53               | 77               | 88                  | 6         | 499                               | 14.6      | 5630                   | 45.1       | 46.9       | 4.4      | 22.4                               | moderate              | 8.49          | 120                      | 44                      |
| N16 | F   | 43  | 78               | 161              | 30.1            | 90                       | 136/83        | advanced   | No  | Yes | 42         | 70         | 48                 | 219        | 218        | 39               | 147              | 97                  | 5.7       | 451                               | 13.9      | 6310                   | 56.9       | 32.2       | 6        | 22.8                               | severe                | 8.14          | 71                       | 18                      |
| N17 | M   | 42  | 101              | 178              | 31.8            | 103                      | 128/87        | early      | DM  | Yes | 19         | 48         | 29                 | 201        | 109        | 53               | 130              | 103                 | 6.5       | 518                               | 15.1      | 6870                   | 49.3       | 39.6       | 7.1      | 27.8                               | moderate              | 10.4          | 97                       | 13                      |
| N18 | M   | 60  | 77               | 175              | 25.1            | 90                       | 125/77        | early      | IGT | Yes | 27         | 43         | 36                 | 194        | 111        | 50               | 126              | 114                 | 6         | 490                               | 14.5      | 4370                   | 53.3       | 33.4       | 6.2      | 21                                 | severe                | 6.15          | 103                      | 22                      |
| N19 | M   | 45  | 85               | 166              | 30.7            | 99                       | 130/81        | early      | IGT | Yes | 24         | 20         | 42                 | 235        | 189        | 44               | 150              | 93                  | 5.8       | 510                               | 15.2      | 4090                   | 50.6       | 32         | 7.1      | 22.7                               | moderate              | 10.5          | 79                       | 28                      |
| N20 | M   | 51  | 73               | 170              | 25.2            | 93                       | 135/76        | advanced   | DM  | Yes | 113        | 149        | 421                | 158        | 145        | 39               | 94               | 287                 | 10.9      | 478                               | 16.1      | 7810                   | 49.8       | 34.6       | 6.8      | 24.9                               | severe                | 0.74          | 197                      | 85                      |
| N21 | M   | 58  | 87               | 181              | 26.6            | 101                      | 121/79        | advanced   | DM  | Yes | 28         | 26         | 48                 | 156        | 139        | 48               | 88               | 124                 | 6.7       | 448                               | 13.9      | 3030                   | 52.1       | 39.3       | 4        | 16.2                               | severe                | 0.67          | 162                      | 109                     |
| N22 | M   | 45  | 95               | 174              | 31.4            | 104                      | 132/79        | early      | DM  | Yes | 38         | 74         | 46                 | 234        | 516        | 41               | 85               | 486                 | 12.4      | 548                               | 16.6      | 3900                   | 55.9       | 35.6       | 5.4      | 18                                 | moderate              | 9.97          | 106                      | 55                      |
| N23 | M   | 29  | 79               | 165              | 28.9            | 93                       | 120/74        | early      | No  | No  | 34         | 63         | 35                 | 202        | 173        | 38               | 127              | 94                  | 5.5       | 481                               | 15        | 5770                   | 49.6       | 39         | 6.2      | 204                                | severe                | 12.3          | 127                      | 10                      |
| N24 | F   | 31  | 70               | 159              | 27.8            | 91                       | 131/77        | early      | No  | No  | 36         | 73         | 23                 | 155        | 71         | 52               | 89               | 102                 | 5.8       | 497                               | 14.2      | 7540                   | 52.6       | 39.7       | 5        | 25.6                               | moderate              | 6.96          | 129                      | 12                      |
| N25 | M   | 52  | 88               | 172              | 29.7            | 101                      | 138/95        | early      | No  | No  | 65         | 148        | 145                | 251        | 180        | 49               | 175              | 95                  | 5.7       | 570                               | 18        | 10400                  | 61.7       | 26.5       | 5.8      | 28.2                               | severe                | 11.2          | 82                       | 28                      |
| N26 | F   | 58  | 56               | 157              | 22.8            | 86                       | 118/63        | early      | No  | No  | 31         | 53         | 50                 | 182        | 133        | 55               | 101              | 95                  | 5.7       | 460                               | 14        | 8000                   | 41.5       | 52.5       | 3.4      | 28.6                               | severe                | 5.76          | 72                       | 19                      |
| N27 | M   | 40  | 112              | 172              | 37.6            | 121                      | 143/92        | advanced   | No  | No  | 34         | 83         | 49                 | 161        | 55         | 59               | 87               | 107                 | 5.1       | 521                               | 17.3      | 4800                   | 55.9       | 27.7       | 8.5      | 17.4                               | severe                | 6.68          | 68                       | 15                      |
| N28 | M   | 56  | 76               | 166              | 28              | 97                       | 126/82        | advanced   | I   | yes | 36         | 60         | 70                 | 173        | 105        | 54               | 114              | 119                 | 6.5       | 569                               | 17.2      | 6940                   | 49.3       | 43.9       | 5.8      | 23.4                               | severe                | 10            | 143                      | 29                      |
| N29 | M   | 56  | 80               | 183              | 23.9            | 97                       | 147/94        | early      | No  | No  | 28         | 39         | 44                 | 212        | 142        | 54               | 141              | 120                 | 6.1       | 582                               | 17.4      | 5740                   | 48.8       | 44.1       | 5.9      | 23.2                               | moderate              | 9.69          | 71                       | 26                      |

M, male; F, female; DM, diabetes mellitus; IGT, impaired glucose tolerance; MS, metabolic syndrome; AST, aspartate aminotransferase; ALT, alanine aminotransferase;  $\gamma$ GT, gamma-glutamyl transpeptidase; TC, total cholesterol; TG, triglyceride; HDL chol, high-density lipoprotein cholesterol; LDL chol, low-density lipoprotein cholesterol; HbA1c, hemoglobin A1c; RBC, red blood cell count; Hb, hemoglobin; WBC, white blood cell count; Neutro, neutrocytes; Lympho, lymphocyte; Mono, monocyte; Plts, platelet; PIIIP, type III procollagen N-terminal peptide.

\*Grade of fatty liver was classified into the 3 categories (mild, moderate, and severe) based on the following ultrasonographic findings: (1) bright liver with increased hepatorenal contrast, (2) deep echo attenuation, and (2) difficulty in detecting intrahepatic vessels (vascular blurrings).

**Supporting Table S2. Clinical and laboratory data of 26 non-NASH patients enrolled in this study.**

| No. | Sex | Age | Body weight (kg) | Body height (cm) | Body mass index | Waist circumference (cm) | Blood pressure | Major illness          | DM  | MS  | AST (IU/L) | ALT (IU/L) | γGT (IU/L) | TC (mg/dL) | TG (mg/dL) | HDL chol (mg/dL) | LDL chol (mg/dL) | Blood sugar (mg/dL) | HbA1c (%) | RBC (×10 <sup>4</sup> /μl) | Hb (g/dl) | WBC (/μl) | Neutro (%) | Lympho (%) | Mono (%) | Plts (×10 <sup>4</sup> /μl) |
|-----|-----|-----|------------------|------------------|-----------------|--------------------------|----------------|------------------------|-----|-----|------------|------------|------------|------------|------------|------------------|------------------|---------------------|-----------|----------------------------|-----------|-----------|------------|------------|----------|-----------------------------|
| C1  | F   | 37  | 50               | 152              | 21.3            | 84                       | 94/60          | hyperlipidemia         | No  | No  | 13         | 10         | 14         | 245        | 71         | 73               | 152              | 58                  | 5.7       | 453                        | 13        | 5160      | 59.1       | 30.6       | 6.8      | 22.2                        |
| C2  | F   | 57  | 62               | 160              | 24.3            | 87                       | 129/93         | IGT                    | IGT | No  | 22         | 21         | 17         | 228        | 114        | 58               | 141              | 98                  | 6         | 423                        | 12.7      | 485       | 46.5       | 42.1       | 5.2      | 27                          |
| C3  | F   | 45  | 60               | 165              | 21.7            | 78                       | 104/70         | chronic gastritis      | No  | No  | 18         | 10         | 13         | 201        | 73         | 55               | 121              | 100                 | 5.7       | 416                        | 12.4      | 4240      | 51.2       | 40.8       | 4.7      | 19.7                        |
| C4  | M   | 51  | 72               | 170              | 24.5            | 90                       | 142/86         | splenic cyst           | IGT | Yes | 19         | 21         | 47         | 196        | 270        | 46               | 115              | 111                 | 6.1       | 572                        | 19.8      | 11040     | 67.5       | 24.6       | 4.9      | 19.6                        |
| C5  | M   | 41  | 66               | 151              | 29              | 83                       | 117/78         | gallbladder polyp      | No  | No  | 14         | 10         | 7          | 157        | 162        | 51               | 87               | 89                  | 4.9       | 487                        | 11.9      | 5510      | 70.8       | 22.9       | 3.8      | 38                          |
| C6  | M   | 49  | 75               | 180              | 23              | 96                       | 122/72         | gallbladder polyp      | No  | No  | 22         | 17         | 16         | 196        | 110        | 47               | 120              | 93                  | 5.6       | 505                        | 15.1      | 4980      | 49.2       | 40.8       | 5.8      | 21.2                        |
| C7  | M   | 54  | 73               | 165              | 26.8            | 90                       | 124/77         | hepatic hemangioma     | No  | No  | 22         | 32         | 84         | 223        | 159        | 45               | 152              | 102                 | 5.6       | 527                        | 16.4      | 8050      | 57.4       | 28.7       | 5.7      | 32.8                        |
| C8  | M   | 77  | 55               | 160              | 21.5            | 85                       | 120/80         | IGT                    | IGT | No  | 20         | 15         | 13         | 178        | 69         | 53               | 116              | 100                 | 6.3       | 415                        | 14        | 3720      | 50         | 38.4       | 8.6      | 20.2                        |
| C9  | M   | 70  | 61               | 163              | 22.9            | —                        | 127/85         | GERD                   | No  | No  | 22         | 20         | 33         | 181        | 103        | 43               | 131              | 94                  | 5.6       | 448                        | 13.8      | 3750      | 40.5       | 49.6       | 5.1      | 13.3                        |
| C10 | F   | 70  | 52               | 157              | 21              | 81                       | 168/91         | colon polyp            | No  | No  | 24         | 21         | 15         | 200        | 18         | 51               | 120              | 117                 | 5.9       | 489                        | 14.6      | 5030      | 49.5       | 42.9       | 4        | 27.4                        |
| C11 | M   | 65  | 57               | 165              | 20.6            | 72                       | 120/75         | gallstone              | No  | No  | 21         | 18         | 17         | 251        | 54         | 98               | 129              | 111                 | 5.5       | 524                        | 15.4      | 4870      | 51.9       | 30.9       | 7.4      | 18.6                        |
| C12 | M   | 55  | 61               | 162              | 23.1            | 78                       | 135/79         | alcoholic fatty liver  | No  | No  | 29         | 34         | 132        | 231        | 74         | 91               | 117              | 119                 | 5.1       | 414                        | 12.9      | 4080      | 60.6       | 32.8       | 4.2      | 18.4                        |
| C13 | M   | 33  | 122              | 177              | 38.6            | 119                      | 142/86         | chronic gastritis      | No  | Yes | 25         | 44         | 100        | 250        | 268        | 49               | 152              | 109                 | 5.8       | 512                        | 16.1      | 6160      | 56.5       | 35.6       | 3.6      | 21.7                        |
| C14 | M   | 67  | 63               | 161              | 24.3            | 91                       | 120/73         | GERD                   | IGT | No  | 20         | 17         | 27         | 194        | 95         | 61               | 114              | 96                  | 6         | 460                        | 14.4      | 4870      | 60.2       | 31.4       | 3.9      | 16.1                        |
| C15 | M   | 64  | 69               | 159              | 27.4            | —                        | 128/75         | drug-induced hepatitis | No  | No  | 21         | 21         | 21         | 167        | 134        | 39               | 99               | 102                 | 5.8       | 473                        | 15        | 3950      | 49.7       | 42         | 5.3      | 23.5                        |
| C16 | M   | 49  | 67               | 179              | 20.9            | 81                       | 128/79         | gastric erosion        | No  | No  | 24         | 25         | 40         | 226        | 63         | 70               | 137              | 97                  | 5.2       | 461                        | 14.7      | 4310      | 50         | 42.5       | 4.2      | 24.5                        |
| C17 | M   | 61  | 60               | 168              | 21.2            | 94                       | 133/88         | chronic gastritis      | DM  | No  | 24         | 24         | 101        | 221        | 139        | 46               | 132              | 108                 | 6.6       | 442                        | 14.1      | 2880      | 52.1       | 38.2       | 5.2      | 21.3                        |
| C18 | M   | 34  | 51               | 163              | 19.2            | 68                       | 119/71         | gallbladder polyp      | No  | No  | 14         | 15         | 27         | 176        | 62         | 80               | 75               | 84                  | 5.4       | 472                        | 14.1      | 4970      | 50.2       | 39.4       | 7.2      | 20.6                        |
| C19 | M   | 60  | 79               | 175              | 25.6            | 94                       | 131/81         | chronic gastritis      | IGT | No  | 30         | 26         | 29         | 183        | 118        | 43               | 112              | 94                  | 6.1       | 478                        | 13.7      | 5230      | 36.1       | 53.3       | 6.7      | 19.3                        |
| C20 | M   | 69  | 66               | 160              | 25.8            | 89                       | 135/81         | chronic gastritis      | IGT | Yes | 21         | 24         | 40         | 174        | 153        | 43               | 99               | 96                  | 6         | 495                        | 14.5      | 5430      | 70.9       | 18.4       | 5.3      | 24.9                        |
| C21 | M   | 63  | 54               | 166              | 19.6            | 73                       | 126/76         | gastric erosion        | —   | No  | 22         | 14         | —          | —          | —          | —                | —                | —                   | —         | 465                        | 14.1      | 5150      | 64.7       | 27         | 5.6      | 25.8                        |
| C22 | M   | 58  | 82               | 171              | 27.8            | 93                       | 142/96         | chronic gastritis      | IGT | Yes | 29         | 27         | 52         | 215        | 105        | 49               | 148              | 114                 | 6.2       | 467                        | 14.4      | 5220      | 52.7       | 40.8       | 5.2      | 22.7                        |
| C23 | F   | 52  | 65               | 154              | 26.8            | 89                       | 120/80         | hyperlipidemia         | No  | No  | 18         | 19         | 18         | 223        | 86         | 70               | 130              | 99                  | 5.9       | 422                        | 13.3      | 5200      | 53.6       | 38.7       | 3.3      | 17.9                        |
| C24 | F   | 64  | 60               | 160              | 23.4            | 80                       | 126/77         | hyperlipidemia         | No  | No  | 22         | 16         | 20         | 230        | 105        | 56               | 150              | 96                  | 5.6       | 474                        | 13.8      | 5950      | 48.9       | 43.9       | 5        | 31.9                        |
| C25 | F   | 64  | 55               | 149              | 24.2            | 81                       | 131/79         | NAFL, hypertension     | IGT | No  | 25         | 29         | 23         | 166        | 184        | 50               | 89               | 130                 | 5.9       | 503                        | 14.1      | 5230      | 57.5       | 33.3       | 5.7      | 20.6                        |
| C26 | F   | 62  | 63               | 154              | 26.3            | 88                       | 126/74         | simple obesity         | No  | No  | 15         | 11         | 12         | 190        | 67         | 60               | 113              | 110                 | 5.9       | 446                        | 13.4      | 4730      | 53.3       | 37.2       | 6.1      | 8.8                         |

GERD, gastroesophageal reflux disease.

**Supporting Table S3. List of antibodies used for immunofluorescence study and flow cytometric analysis.**

**1) Immunofluorescence study**

| Primary antibodies             | Target cell             | Manufacturer                      | Catalog No. | Clone   | Dilution      |
|--------------------------------|-------------------------|-----------------------------------|-------------|---------|---------------|
| rabbit anti-MMP-1 moAb         | —                       | Abcam, Cambridge, UK              | ab52631     | EP1247Y | 1 : 100 - 200 |
| mouse anti-CD11b moAb          | monocytes               | Hycult Biotech, PA, USA           | HM2125      | Bear-1  | 1 : 100 - 200 |
| rat anti-F4/80 moAb            | Kupffer cells           | Abcam, Cambridge, UK              | ab6640      | A3-1    | 1 : 50 - 100  |
| mouse anti- $\alpha$ -SMA moAb | activated HSC           | Sigma-Aldrich, MO, USA            | A2547       | 1A4     | 1 : 200 - 500 |
| rat anti-GFAP moAb             | quiescent HSC           | Thermo Fisher Scientific, CA, USA | 13-0300     | 2.2B10  | 1 : 200 - 500 |
| mouse anti-OV-6 moAb           | hepatic progenitor cell | R&D Systems, MN, USA              | MAB2020     | OV-6    | 1 : 20 - 100  |
| mouse anti-CK19 moAb           | hepatic progenitor cell | Abcam, Cambridge, UK              | ab9221      | RCK108  | 1 : 100 - 200 |
| mouse anti-HNF4 $\alpha$ moAb  | hepatocyte              | Perseus Proteomics, Tokyo, Japan  | PP-H1415-00 | H1415   | 1 : 50 - 100  |
| mouse anti-CD31 moAb           | endothelial cell        | BD Biosciences, NJ, USA           | 550389      | WM59    | 1 : 100       |

moAb, monoclonal antibody; MMP-1, matrix metalloproteinase-1;  $\alpha$ -SMA,  $\alpha$ -smooth muscle actin; GFAP, glial fibrillary acidic protein, CK19, cytokeratin 19; HNF4 $\alpha$ , hepatocyte nuclear factor 4 $\alpha$ , HSC, hepatic stellate cell.

| Secondary antibodies                       | Manufacturer                      | Catalog No. | Dilution  | Target primary antibodies                     |
|--------------------------------------------|-----------------------------------|-------------|-----------|-----------------------------------------------|
| Alexa 555-conjugated goat anti-rabbit IgG  | Thermo Fisher Scientific, CA, USA | A-21429     | 1 : 1,000 | anti-MMP-1 moAb                               |
| Alexa 488-conjugated goat anti-mouse IgG   | Thermo Fisher Scientific, CA, USA | A-11029     | 1 : 1,000 | anti-CD11b & anti-CD31 moAb                   |
| Alexa 647-conjugated goat anti-rat IgG     | Thermo Fisher Scientific, CA, USA | A-21247     | 1 : 1,000 | anti-F4/80 & anti-GFAP moAb                   |
| Alexa 488-conjugated goat anti-mouse IgG2a | Thermo Fisher Scientific, CA, USA | A-21131     | 1 : 1,000 | anti- $\alpha$ -SMA & anti-HNF4 $\alpha$ moAb |
| Alexa 647-conjugated goat anti-mouse IgG1  | Thermo Fisher Scientific, CA, USA | A-21240     | 1 : 1,000 | anti-OV-6 & anti-CK19 moAb                    |

**2) Flow cytometric analysis**

| Primary antibodies                 | Manufacturer             | Catalog No. | Clone | Dilution    |
|------------------------------------|--------------------------|-------------|-------|-------------|
| PC7-conjugated mouse anti-CD45 Ab  | Beckman Coulter, CA, USA | IM3548U     | J33   | 1 : 10 - 20 |
| FITC-conjugated mouse anti-CD14 Ab | Beckman Coulter, CA, USA | IM0645U     | RM052 | 1 : 10 - 20 |
| PE-conjugated mouse anti-CD34 Ab   | Beckman Coulter, CA, USA | IM1871U     | 581   | 1 : 10 - 20 |

| Isotype control            | Manufacturer             | Catalog No. | Clone    | Dilution |
|----------------------------|--------------------------|-------------|----------|----------|
| PC7-conjugated mouse IgG1  | Beckman Coulter, CA, USA | 737662      | 679.1Mc7 | 1 : 10   |
| FITC-conjugated mouse IgG2 | Beckman Coulter, CA, USA | A12689      | 7T4-1F5  | 1 : 10   |
| PE-conjugated mouse IgG1   | Beckman Coulter, CA, USA | A07796      | 679.1Mc7 | 1 : 10   |

**Supporting Table S4. Histopathological findings of 29 NASH patients underdoing liver biopsy.**

| No. | NASH stage | Matteoni type | Brunt grade | Brunt stage | NASH activity score | Steatosis | Lobular Inflammation | Ballooning | Fibrosis | Mallory body | Ductular reaction |
|-----|------------|---------------|-------------|-------------|---------------------|-----------|----------------------|------------|----------|--------------|-------------------|
| N1  | advanced   | 4             | 2           | 3           | 6                   | 2         | 2                    | 2          | 3        | 0            | ++                |
| N2  | early      | 3             | 2           | 1           | 6                   | 2         | 2                    | 2          | 1B       | 1            | +/-               |
| N3  | early      | 3             | 2           | 1           | 4                   | 3         | 1                    | 2          | 2        | 0            | +/-               |
| N4  | advanced   | 4             | 2           | 2           | 7                   | 2         | 3                    | 2          | 3        | 0            | +/-               |
| N5  | advanced   | 4             | 3           | 3           | 6                   | 3         | 2                    | 1          | 3        | 0            | +++               |
| N6  | advanced   | 4             | 2           | 3           | 7                   | 2         | 3                    | 2          | 2        | 0            | +/-               |
| N7  | early      | 3             | 2           | 1           | 4                   | 1         | 1                    | 2          | 1C       | 0            | +                 |
| N8  | early      | 3             | 2           | 2           | 7                   | 3         | 2                    | 2          | 1C       | 0            | +                 |
| N9  | early      | 3             | 3           | 2           | 7                   | 3         | 2                    | 2          | 1C       | 0            | +                 |
| N10 | early      | 3             | 2           | 2           | 5                   | 2         | 3                    | 2          | 1C       | 0            | +++               |
| N11 | advanced   | 4             | 2           | 3           | 4                   | 1         | 2                    | 1          | 3        | 0            | +                 |
| N12 | advanced   | 4             | 3           | 3           | 7                   | 3         | 2                    | 2          | 2        | 0            | +++               |
| N13 | advanced   | 4             | 3           | 2           | 6                   | 2         | 2                    | 2          | 1C       | 0            | ++                |
| N14 | early      | 3             | 3           | 2           | 6                   | 2         | 3                    | 1          | 2        | 0            | ++                |
| N15 | early      | 3             | 2           | 1           | 5                   | 2         | 1                    | 2          | 1        | 1            | +/-               |
| N16 | advanced   | 4             | 3           | 3           | 8                   | 3         | 3                    | 2          | 3        | 1            | +                 |
| N17 | early      | 3             | 2           | 2           | 5                   | 2         | 1                    | 2          | 1A       | 0            | +/-               |
| N18 | early      | 3             | 3           | 2           | 6                   | 3         | 1                    | 2          | 1A       | 1            | +/-               |
| N19 | early      | 3             | 3           | 2           | 7                   | 3         | 2                    | 2          | 2        | 0            | ++                |
| N20 | advanced   | 4             | 3           | 4           | 6                   | 2         | 3                    | 1          | 4        | 1            | +++               |
| N21 | advanced   | 4             | 3           | 3           | 5                   | 2         | 2                    | 1          | 3        | 0            | +++               |
| N22 | early      | 3             | 3           | 1           | 7                   | 3         | 2                    | 2          | 2        | 0            | +                 |
| N23 | early      | 3             | 3           | 2           | 6                   | 3         | 2                    | 1          | 2        | 1            | ++                |
| N24 | early      | 3             | 3           | 2           | 8                   | 3         | 2                    | 3          | 1C       | 1            | +                 |
| N25 | early      | 3             | 2           | 1           | 5                   | 2         | 1                    | 2          | 1C       | 1            | +                 |
| N26 | early      | 3             | 3           | 2           | 5                   | 1         | 2                    | 2          | 1C       | 1            | ++                |
| N27 | advanced   | 4             | 2           | 3           | 6                   | 2         | 3                    | 2          | 3        | 0            | ++                |
| N28 | advanced   | 3             | 2           | 2           | 5                   | 2         | 1                    | 2          | 2        | 0            | +                 |
| N29 | early      | 3             | 2           | 2           | 5                   | 1         | 2                    | 2          | 1        | 0            | +                 |

**Supporting Table S5. Comparison of clinical and laboratory data between non-NASH and NASH Patients.**

|                                              | Non-NASH          | NASH               | Early-stage NASH  | Advanced-stage NASH |
|----------------------------------------------|-------------------|--------------------|-------------------|---------------------|
| Number of patients                           | 26                | 29                 | 17                | 12                  |
| Sex (Men/Women)                              | 18/8 (69/31%)     | 23/6 (77/23%)      | 14/3 (82/18%)     | 9/3(75/25%)         |
| Age (years)                                  | 56.6 ± 11.6       | 48.0 ± 10.2        | 46.5 ± 11.2       | 50.2 ± 7.7          |
| BMI (kg/m <sup>2</sup> )                     | 24.3 ± 4.0**      | 27.5 ± 4.4         | 27.7 ± 3.6        | 27.1 ± 5.2          |
| DM/Impaired glucose tolerance (GT)/normal GT | 1/8/16 (4/32/64%) | 7/7/15 (24/24/52%) | 4/4/9 (24/24/52%) | 3/3/6 (25/25/50%)   |
| MS (+/-)                                     | 4/22 (15/85%)**   | 15/14 (52/48%)     | 8/9 (47/53%)      | 7/5 (58/42%)        |
| AST (IU/L)                                   | 21.4 ± 4.4**      | 35.1 ± 19.9        | 33.4 ± 18.2       | 38.3 ± 23.9         |
| ALT (IU/L)                                   | 20.8 ± 8.1**      | 52.6 ± 33.8        | 57.1 ± 46.0       | 53.3 ± 35.2         |
| γ-GT (IU/L)                                  | 36.7 ± 32.9*      | 65.9 ± 83.8        | 41.6 ± 30.2       | 88.9 ± 109.5        |
| Total cholesterol (mg/dL)                    | 204.1 ± 27.7      | 187.7 ± 32.6       | 187.5 ± 30.1      | 190 ± 35.7          |
| LDL cholesterol (mg/dL)                      | 122 ± 21.4        | 112.4 ± 26.5       | 113.9 ± 26.1      | 116.5 ± 26.5        |
| HDL cholesterol (mg/dL)                      | 57.1 ± 15.4       | 49.3 ± 9.8         | 48.4 ± 6.8        | 51.5 ± 12.2         |
| Triglyceride (mg/dL)                         | 114.2 ± 60.8      | 152.3 ± 95.7       | 153.6 ± 81.4      | 125 ± 54.2          |
| Blood sugar (mg/dL)                          | 101.1 ± 13.8      | 125.6 ± 77.8       | 107.1 ± 15.6      | 122.4 ± 50.9        |
| HbA1c (%)                                    | 5.78 ± 0.38       | 6.3 ± 1.6          | 6.0 ± 0.7         | 6.4 ± 1.5           |
| WBC                                          | 5008 ± 1788*      | 5978 ± 1572        | 5945 ± 1531       | 5829 ± 1463         |
| Neutro (%)                                   | 54.3 ± 8.3        | 52.6 ± 6.3         | 54.1 ± 5.0        | 51.3 ± 6.6          |
| Lympho (%)                                   | 36.4 ± 8.1        | 36.7 ± 7.3         | 35.4 ± 6.2        | 36.9 ± 7.1          |
| Mono (%)                                     | 5.3 ± 1.3*        | 6.0 ± 1.2          | 6.2 ± 1.2         | 6.1 ± 1.3           |
| Plts (10 <sup>3</sup> /mL)                   | 22.2 ± 6.0        | 29.9 ± 33.8        | 35.5 ± 42.3       | 21.6 ± 5.0          |
| Histological characteristics                 |                   |                    |                   |                     |
| Steatosis grade (0/1/2/3)                    | ND                | 0/4/14/11          | 0/3/6/8           | 0/1/8/3             |
| Lobular inflammation grade (0/1/2/3)         | ND                | 0/7/15/7           | 0/6/9/2           | 0/1/6/5             |
| Ballooning grade (0/1/2)                     | ND                | 0/6/23             | 0/2/15            | 0/4/8               |
| Fibrosis stage (1/2/3/4)                     | ND                | 13/8/7/1           | 12/5/0/0          | 1/3/7/1             |
| PIIIP (ng/ml)                                | ND                | 9.19 ± 12.32       | 7.28 ± 3.22       | 10.83 ± 18.41       |
| Type IV collagen (ng/ml)                     | ND                | 111.2 ± 38.8       | 104.7 ± 23.0      | 121.4 ± 50.9        |
| Hyaluronic acid (ng/ml)                      | ND                | 28.6 ± 23.0        | 22.4 ± 11.4       | 33.9 ± 31.4         |

GT, glucose tolerance; ND, not determined.

\* \*\*Statistically significant between non-NASH and NASH patients (\* $P < 0.05$ , \*\* $P < 0.01$ )

**Supporting Table S6. Medications administered to 29 NASH patients.**

| No. | Dyslipidemia           | Diabetes mellitus | Hyperuricemia | Hypertension | Others     |
|-----|------------------------|-------------------|---------------|--------------|------------|
| N1  | no                     | no                | no            | no           |            |
| N2  | bezafibrate, ezetimibe | metformin         | no            | no           |            |
| N3  | bezafibrate, ezetimibe | canagliflozin     | no            | no           |            |
| N4  | no                     | pioglitazone      | no            | no           |            |
| N5  | pravastatin            | no                | no            | no           |            |
| N6  | bezafibrate            | pioglitazone      | no            | no           |            |
| N7  | bezafibrate            | pioglitazone      | allopurinol   | azilsartan   |            |
| N8  | bezafibrate, ezetimibe | pioglitazone      | benzbromarone | no           |            |
| N9  | no                     | no                | no            | azilsartan   |            |
| N10 | no                     | no                | no            | no           | UDCA       |
| N11 | no                     | no                | benzbromarone | no           | famotidine |
| N12 | bezafibrate, ezetimibe | voglibose         | no            | no           |            |
| N13 | no                     | pioglitazone      | no            | no           |            |
| N14 | atorvastatin           | pioglitazone      | no            | no           | UDCA       |
| N15 | bezafibrate, ezetimibe | pioglitazone      | no            | no           |            |
| N16 | bezafibrate            | pioglitazone      | no            | no           |            |
| N17 | bezafibrate            | metformin         | no            | no           | celecoxib  |
| N18 | bezafibrate            | no                | febuxostat    | no           |            |
| N19 | bezafibrate            | no                | febuxostat    | no           |            |
| N20 | ezetimibe              | pioglitazone      | no            | no           |            |
| N21 | bezafibrate            | metformin         | no            | no           |            |
| N22 | bezafibrate            | pioglitazone      | benzbromarone | no           |            |
| N23 | no                     | no                | no            | no           |            |
| N24 | no                     | no                | no            | no           |            |
| N25 | no                     | no                | no            | no           |            |
| N26 | bezafibrate, ezetimibe | no                | no            | no           |            |
| N27 | ezetimibe              | no                | no            | no           |            |
| N28 | rosuvastatin           | no                | no            | no           |            |
| N29 | bezafibrate            | no                | febuxostat    | azilsartan   |            |

UCDA, ursodeoxycholic acid.

**Supporting Table S7. Medications administered to 26 non-NASH patients.**

| No. | Dyslipidemia | Diabetes mellitus | Hyperuricemia | Others       |
|-----|--------------|-------------------|---------------|--------------|
| C1  | pravastatin  | no                | no            |              |
| C2  | rosuvastatin | no                | no            |              |
| C3  | no           | no                | no            |              |
| C4  | no           | no                | no            |              |
| C5  | no           | no                | no            | UDCA         |
| C6  | no           | no                | no            |              |
| C7  | no           | no                | no            |              |
| C8  | bezafibrate  | metformin         | no            |              |
| C9  | no           | no                | no            | esomeprazole |
| C10 | no           | no                | no            |              |
| C11 | no           | no                | no            | UDCA         |
| C12 | no           | no                | no            |              |
| C13 | rosuvastatin | no                | no            |              |
| C14 | pravastatin  | no                | no            | famotidine   |
| C15 | no           | pioglitazone      | no            |              |
| C16 | no           | no                | no            | famotidine   |
| C17 | no           | no                | no            | esomeprazole |
| C18 | no           | no                | no            |              |
| C19 | no           | no                | no            | vonoprazan   |
| C20 | rosuvastatin | no                | no            |              |
| C21 | no           | no                | no            | famotidine   |
| C22 | no           | no                | no            |              |
| C23 | pravastatin  | no                | no            |              |
| C24 | bezafibrate  | no                | no            |              |
| C25 | no           | no                | no            |              |
| C26 | no           | no                | no            |              |

**Supporting Table S8. Flow cytometric analysis of PBMNCs in 29 NASH patients.**

| No. | R1 (%) | R2 (%) | R3 (%) | R4 (%) |
|-----|--------|--------|--------|--------|
| N1  | 98.45  | 1.26   | 0.05   | 0.06   |
| N2  | 93.94  | 5.18   | 0.15   | 0.16   |
| N3  | 96.42  | 2.34   | 0.67   | 0.06   |
| N4  | 96.86  | 2.29   | 0.42   | 0.03   |
| N5  | 90.73  | 8.40   | 0.71   | 0.02   |
| N6  | 92.86  | 6.55   | 0.08   | 0.11   |
| N7  | 76.61  | 19.59  | 1.47   | 0.15   |
| N8  | 91.32  | 6.67   | 1.05   | 0.28   |
| N9  | 94.08  | 3.85   | 1.22   | 0.08   |
| N10 | 90.14  | 7.71   | 1.40   | 0.07   |
| N11 | 88.80  | 9.57   | 0.57   | 0.06   |
| N12 | 93.89  | 3.10   | 2.22   | 0.03   |
| N13 | 85.62  | 13.17  | 0.13   | 0.31   |
| N14 | 78.36  | 19.80  | 0.30   | 0.13   |
| N15 | 98.89  | 0.83   | 0.14   | 0.02   |
| N16 | 97.69  | 1.80   | 0.25   | 0.02   |
| N17 | 97.51  | 2.08   | 0.12   | 0.04   |
| N18 | 95.36  | 3.33   | 0.78   | 0.04   |
| N19 | 92.31  | 6.92   | 0.73   | 0.01   |
| N20 | 94.14  | 3.39   | 1.94   | 0.11   |
| N21 | 88.77  | 11.04  | 0.32   | 0.05   |
| N22 | 93.15  | 4.57   | 1.15   | 0.61   |
| N23 | 91.18  | 8.58   | 0.06   | 0.09   |
| N24 | 98.13  | 1.45   | 0.10   | 0.12   |
| N25 | 96.67  | 2.52   | 0.56   | 0.04   |
| N26 | 98.91  | 0.89   | 0.09   | 0.03   |
| N27 | 93.78  | 4.29   | 0.31   | 0.04   |
| N28 | 98.34  | 0.81   | 0.49   | 0.02   |
| N29 | 97.19  | 0.37   | 1.90   | 0.60   |

PBMNC, peripheral blood mononuclear cells.

Note: Proportions of each PBMNC fraction are shown by percentage among whole CD45<sup>+</sup> cells.

R1, CD45<sup>+</sup>CD14<sup>-</sup>CD34<sup>-</sup> cells; R2, CD45<sup>+</sup>CD14<sup>+</sup>CD34<sup>-</sup> cells; R3, CD45<sup>+</sup>CD14<sup>+</sup>CD34<sup>+</sup> cells;

R4, CD45<sup>+</sup>CD14<sup>-</sup>CD34<sup>+</sup> cells.



**Supporting Table S9. Flow cytometric analysis of PBMNCs in 26 non-NASH patients.**

| No. | R1 (%) | R2 (%) | R3 (%) | R4 (%) |
|-----|--------|--------|--------|--------|
| C1  | 96.3   | 0.19   | 2.37   | 6.16   |
| C2  | 94.4   | 4.14   | 0.72   | 0.14   |
| C3  | 96.6   | 2.55   | 0.47   | 0.06   |
| C4  | 97.5   | 1.90   | 0.33   | 0.10   |
| C5  | 97.5   | 2.24   | 0.01   | 0.16   |
| C6  | 98.1   | 1.41   | 0.08   | 0.04   |
| C7  | 82.2   | 16.2   | 0.17   | 0.16   |
| C8  | 83.3   | 15.3   | 0.65   | 0.05   |
| C9  | 91.2   | 8.09   | 0.11   | 0.10   |
| C10 | 94.1   | 4.91   | 0.32   | 0.05   |
| C11 | 63.0   | 29.2   | 5.90   | 0.14   |
| C12 | 74.8   | 22.6   | 1.63   | 0.04   |
| C13 | 93.6   | 5.58   | 0.51   | 0.07   |
| C14 | 89.0   | 9.57   | 0.51   | 0.08   |
| C15 | 89.3   | 9.55   | 0.40   | 0.08   |
| C16 | 74.3   | 23.0   | 0.46   | 0.11   |
| C17 | 87.7   | 10.67  | 0.79   | 0.02   |
| C18 | 96.6   | 3.20   | 0.08   | 0.02   |
| C19 | 74.7   | 19.93  | 3.50   | 0.07   |
| C20 | 94.6   | 4.63   | 0.28   | 0.04   |
| C21 | 96.2   | 2.71   | 0.50   | 0.32   |
| C22 | 95.2   | 1.27   | 3.24   | 0.07   |
| C23 | 96.65  | 3.09   | 0.28   | 0.04   |
| C24 | 87.75  | 12.44  | 0.05   | 0.05   |
| C25 | 76.70  | 16.36  | 6.88   | 0.47   |
| C26 | 95.46  | 3.22   | 0.77   | 0.02   |

**Supporting Table S10. Correlation between R3 population and histopathological features in 29 NASH patients.**

|                          | NASH<br>(n = 29) | Early NASH<br>(n = 17) | Advanced NASH<br>(n = 12) |
|--------------------------|------------------|------------------------|---------------------------|
| <b>Steatosis</b>         |                  |                        |                           |
| 1                        | 1.20 ± 0.83      | 1.36 ± 0.87            | 0.57                      |
| 2                        | 0.55 ± 0.63      | 0.45 ± 0.50            | 0.62 ± 0.73               |
| 3                        | 0.84 ± 0.67      | 0.78 ± 0.63            | 1.00 ± 0.85               |
| <b>Inflammation</b>      |                  |                        |                           |
| 1                        | 0.78 ± 0.64      | 0.82 ± 0.68            | 0.49                      |
| 2                        | 0.77 ± 0.73      | 0.77 ± 0.75            | 0.77 ± 0.76               |
| 3                        | 0.74 ± 0.75      | 0.85 ± 0.78            | 0.69 ± 0.85               |
| <b>Ballooning</b>        |                  |                        |                           |
| 1                        | 0.09 ± 0.09      | 0.85 ± 0.78            | 1.03 ± 0.68               |
| 2                        | 0.12 ± 0.16      | 0.79 ± 0.70            | 0.49 ± 0.72               |
| <b>Fibrosis</b>          |                  |                        |                           |
| 1                        | 0.71 ± 0.70      | 0.79 ± 0.70            | 0.11 ± 0.04               |
| 2                        | 0.92 ± 0.80      | 0.79 ± 0.72            | 1.36 ± 1.22               |
| 3                        | 0.59 ± 0.52      |                        | 0.59 ± 0.52               |
| 4                        | 1.94             |                        | 1.94                      |
| <b>NAS</b>               |                  |                        |                           |
| 4                        | 0.10 ± 0.67      | 0.58 ± 0.77            | 0.42                      |
| 5                        | 0.54 ± 0.74      | 0.66 ± 0.72            | 0.89 ± 0.91               |
| 6                        | 1.12 ± 0.58      | 1.09 ± 0.67            | 0.98 ± 0.85               |
| 7                        | 0.74 ± 0.77      | 0.78 ± 0.78            | 0.36 ± 0.33               |
| 8                        | 0.18 ± 0.11      | 1.15                   | 0.08                      |
| <b>Ductular reaction</b> |                  |                        |                           |
| 0                        | 0.33 ± 0.70      | 0.37 ± 0.32            | 0.25 ± 0.17               |
| 1                        | 0.92 ± 0.64      | 1.00 ± 0.67            | 0.53 ± 0.06               |
| 2                        | 0.49 ± 0.74      | 0.68 ± 0.91            | 0.16 ± 0.13               |
| 3                        | 1.32 ± 0.71      | 1.40                   | 1.31 ± 0.78               |

NAS, NASH activity score.

Note: Values represent the populations of R3 fraction (means ± SD %) in patients who are classified into different categories according the histopathological features of their liver biopsy specimens.

**Supporting Table S11. Correlation between R4 population and histopathological features in 29 NASH patients.**

|                          | NASH<br>(n = 29) | Early NASH<br>(n = 17) | Advanced NASH<br>(n = 12) |
|--------------------------|------------------|------------------------|---------------------------|
| <b>Steatosis</b>         |                  |                        |                           |
| 1                        | 0.17 ± 0.24      | 0.20 ± 0.27            | 0.06                      |
| 2                        | 0.08 ± 0.08      | 0.08 ± 0.06            | 0.08 ± 0.09               |
| 3                        | 0.12 ± 0.16      | 0.14 ± 0.17            | 0.09 ± 0.13               |
| <b>Inflammation</b>      |                  |                        |                           |
| 1                        | 0.05 ± 0.04      | 0.05 ± 0.04            | 0.02                      |
| 2                        | 0.14 ± 0.18      | 0.18 ± 0.21            | 0.09 ± 0.12               |
| 3                        | 0.08 ± 0.04      | 0.10 ± 0.04            | 0.07 ± 0.04               |
| <b>Ballooning</b>        |                  |                        |                           |
| 1                        | 0.82 ± 0.70      | 0.10 ± 0.04            | 0.09 ± 0.10               |
| 2                        | 0.75 ± 0.71      | 0.14 ± 0.18            | 0.08 ± 0.10               |
| <b>Fibrosis</b>          |                  |                        |                           |
| 1                        | 0.14 ± 0.14      | 0.13 ± 0.15            | 0.21 ± 0.14               |
| 2                        | 0.12 ± 0.19      | 0.15 ± 0.21            | 0.03 ± 0.01               |
| 3                        | 0.06 ± 0.08      |                        | 0.06 ± 0.08               |
| 4                        | 0.11             |                        | 0.11                      |
| <b>NAS</b>               |                  |                        |                           |
| 4                        | 0.11 ± 0.05      | 0.07 ± 0.07            | 0.03                      |
| 5                        | 0.10 ± 0.19      | 0.21 ± 0.21            | 0.05 ± 0.05               |
| 6                        | 0.11 ± 0.10      | 0.06 ± 0.02            | 0.12 ± 0.14               |
| 7                        | 0.10 ± 0.18      | 0.07 ± 0.05            | 0.04 ± 0.02               |
| 8                        | 0.07 ± 0.07      | 0.61                   | 0.11                      |
| <b>Ductular reaction</b> |                  |                        |                           |
| 0                        | 0.06 ± 0.14      | 0.06 ± 0.06            | 0.05 ± 0.05               |
| 1                        | 0.18 ± 0.21      | 0.21 ± 0.22            | 0.04 ± 0.03               |
| 2                        | 0.09 ± 0.10      | 0.06 ± 0.05            | 0.14 ± 0.15               |
| 3                        | 0.08 ± 0.09      | 0.07                   | 0.08 ± 0.10               |

Note: Values represent the populations of R4 fraction (means ± SD %) in patients who are classified into different categories according the histopathological features of their liver biopsy specimens.

**Supporting Table S12. Populations of MMP-1-positive cells in monocytic lineage cells after co-culture with steatotic hepatocytes obtained from 3 NASH patients.**

| Patients                                                         | N24          | N27           | N29             |
|------------------------------------------------------------------|--------------|---------------|-----------------|
| CD45 <sup>+</sup> CD14 <sup>+</sup> CD34 <sup>-</sup> cells (R2) | 7/44 (15.9%) | 4/31 (12.9%)  | 36/166 (21.7%)  |
| CD45 <sup>+</sup> CD14 <sup>+</sup> CD34 <sup>+</sup> cells (R3) | ND           | 21/52 (40.4%) | 108/126 (85.7%) |

ND, not determined by a lack of enough number of cells for co-culture.

Note: Cells were collected from each well of a Lab-Tek chamber slide and sorted by flow cytometry. Values represent the populations of MMP-1-positive cells out of CD14<sup>+</sup> monocytic lineage cells (%) in each fraction observed under a confocal laser-scanning microscope.
